# Supplementary material for: Relationship between Dietary Habits and Control of Lipid Profiles in Patients with Dyslipidemia Using Pravastatin
Source: MDPI journal article supplement (doi:10.3390/nu13113784), 2021-10-25
Supplement: s1 [file s1]

## Supplementary Materials

**Table S1.** The modified version of the Mini Dietary Assessment Index for Koreans.

| Questions                                                                                                                             | Response options                       |
|---------------------------------------------------------------------------------------------------------------------------------------|----------------------------------------|
| 1. I drink at least one cup (200 mL) of milk, calcium-fortified soy milk, or other dairy products daily.                              | · Always<br>· Usually<br>· No          |
| 2. I eat meat, fish, eggs, beans, or tofu at least three times a day.                                                                 | · Always<br>· Usually<br>· No          |
| 3. I eat vegetables other than Kimchi in every meal.                                                                                  | · Always<br>· Usually<br>· No          |
| 4. I eat a fruit everyday (including pulped fruit).                                                                                   | · Always<br>· Usually<br>· No          |
| 5. How often do you eat fried or stir-fried dishes?                                                                                   | · ≥ 4/week<br>· 2–3/week<br>· < 1/week |
| 6. How often do you eat foods high in cholesterol (pork belly, egg yolk, squid)?                                                      | · ≥ 4/week<br>· 2–3/week<br>· < 1/week |
| 7. I eat one of the following items every day: ice cream, cake, sweets, and soft drinks.                                              | · Always<br>· Usually<br>· No          |
| 8. I eat salted seafood, pickled vegetables, or salted fish every day.                                                                | · Always<br>· Usually<br>· No          |
| 9. I have a regular eating schedule.                                                                                                  | · Always<br>· Usually<br>· No          |
| 10. Among grains, meat/fish/eggs/legumes, vegetables, fruits, and milk products, how many types of foods do you usually eat in a day? | · 5 types<br>· 4 types<br>· ≤ 3 types  |
| 11. How often do you eat out (excluding meals served at workplace cafeteria)?                                                         | · ≥ 5/week<br>· 2–4/week<br>· < 1/week |

**Table S2.** Baseline characteristics of the 284 study participants with and without controlled TG at 6 months.

|                              | Participants with<br>TG < 150 mg/dL<br>at 6 months (n = 194) | Participants with<br>TG ≥ 150 mg/dL<br>at 6 months (n = 90) | p-value |
|------------------------------|--------------------------------------------------------------|-------------------------------------------------------------|---------|
|                              | N (%) or Mean (SD)                                           | N (%) or Mean (SD)                                          |         |
| Age (years)                  |                                                              |                                                             |         |
| < 60                         | 66 (70.2)                                                    | 28 (29.8)                                                   | 0.644   |
| 60–69                        | 69 (67.6)                                                    | 33 (32.4)                                                   |         |
| ≥ 70                         | 59 (67.0)                                                    | 29 (33.0)                                                   |         |
| Sex                          |                                                              |                                                             |         |
| Male                         | 70 (56.9)                                                    | 53 (43.1)                                                   | < 0.001 |
| Female                       | 124 (77.0)                                                   | 37 (23.0)                                                   |         |
| Household income (KRW/month) |                                                              |                                                             |         |
| < 200                        | 22 (59.5)                                                    | 15 (40.5)                                                   | 0.377   |
| 200–399                      | 61 (70.1)                                                    | 26 (29.9)                                                   |         |
| 400–600                      | 40 (60.6)                                                    | 26 (39.4)                                                   |         |

|                                             |              |              |         |
|---------------------------------------------|--------------|--------------|---------|
| ≥ 600                                       | 40 (74.1)    | 14 (25.9)    |         |
| Marital status                              |              |              |         |
| Married                                     | 165 (72.7)   | 62 (27.3)    | 0.001   |
| Divorced/Widowed/Separated                  | 21 (55.3)    | 17 (44.7)    |         |
| Single                                      | 3 (30.0)     | 7 (70.0)     |         |
| Alcohol consumption                         |              |              |         |
| No                                          | 78 (70.9)    | 32 (29.1)    | 0.599   |
| Yes                                         | 115 (67.6)   | 55 (32.4)    |         |
| Smoking status                              |              |              |         |
| No                                          | 177 (70.0)   | 76 (30.0)    | 0.088   |
| Yes                                         | 15 (53.6)    | 13 (46.4)    |         |
| Physical activity                           |              |              |         |
| Low                                         | 80 (73.4)    | 29 (26.6)    | 0.357   |
| Middle                                      | 66 (63.5)    | 38 (36.5)    |         |
| High                                        | 45 (68.2)    | 21 (31.8)    |         |
| BMI (kg/m <sup>2</sup> )                    |              |              |         |
| < 23                                        | 60 (76.9)    | 18 (23.1)    | 0.025   |
| 23–24.9                                     | 60 (71.4)    | 24 (28.6)    |         |
| ≥ 25                                        | 72 (62.1)    | 44 (37.9)    |         |
| Hypertension                                |              |              |         |
| No                                          | 108 (70.6)   | 45 (29.4)    | 0.443   |
| Yes                                         | 86 (65.6)    | 45 (34.4)    |         |
| Diabetes                                    |              |              |         |
| No                                          | 159 (70.0)   | 68 (30.0)    | 0.201   |
| Yes                                         | 34 (60.7)    | 22 (39.3)    |         |
| Compliance in taking the statin at 6 months |              |              |         |
| < 80%                                       | 7 (63.6)     | 4 (36.4)     | 0.745   |
| ≥ 80%                                       | 170 (68.8)   | 77 (31.2)    |         |
| SBP (mmHg)                                  | 126.8 (12.6) | 129.6 (12.8) | 0.087   |
| DBP (mmHg)                                  | 76.5 (9.2)   | 76.9 (9.2)   | 0.769   |
| Fasting glucose (mg/dL)                     | 109.5 (22.2) | 112.2 (25.7) | 0.390   |
| HbA1c (%)                                   | 7.2 (1.0)    | 8.5 (2.3)    | 0.554   |
| TC (mg/dL)                                  | 233.5 (31.6) | 227.8 (33.2) | 0.165   |
| TG (mg/dL)                                  | 123.0 (57.6) | 198.4 (81.8) | < 0.001 |
| HDL-C (mg/dL)                               | 60.4 (17.4)  | 50.0 (13.4)  | < 0.001 |
| LDL-C (mg/dL)                               | 152.6 (27.0) | 148.2 (29.2) | 0.217   |

TG: triglyceride, SD: standard deviation, KRW: Korean Won, BMI: body mass index, SBP: systolic blood pressure, DBP: diastolic blood pressure, HbA1c: hemoglobin A1c, TC: total cholesterol, HDL-C: high-density lipoprotein cholesterol, LDL-C: low-density lipoprotein cholesterol, P for trend is presented for (2 × n) variables.

**Table S3.** Baseline characteristics of the 284 study participants with and without controlled TC at 6 months.

|                              | Participants with<br>TC < 200 mg/dL<br>at 6 months (n = 186) | Participants with<br>TC ≥ 200 mg/dL<br>at 6 months (n = 98) | p-value |
|------------------------------|--------------------------------------------------------------|-------------------------------------------------------------|---------|
|                              | N (%) or Mean (SD)                                           | N (%) or Mean (SD)                                          |         |
| Age (years)                  |                                                              |                                                             |         |
| < 60                         | 51 (54.3)                                                    | 43 (45.7)                                                   | 0.030   |
| 60–69                        | 74 (72.5)                                                    | 28 (27.5)                                                   |         |
| ≥ 70                         | 61 (69.3)                                                    | 27 (30.7)                                                   |         |
| Sex                          |                                                              |                                                             |         |
| Male                         | 86 (69.9)                                                    | 37 (30.1)                                                   | 0.208   |
| Female                       | 100 (62.1)                                                   | 61 (37.9)                                                   |         |
| Household income (KRW/month) |                                                              |                                                             |         |
| < 200                        | 28 (75.7)                                                    | 9 (24.3)                                                    | 0.233   |
| 200–399                      | 57 (65.5)                                                    | 30 (34.5)                                                   |         |
| 400–600                      | 41 (62.1)                                                    | 25 (37.9)                                                   |         |
| ≥ 600                        | 34 (63.0)                                                    | 20 (37.0)                                                   |         |
| Marital status               |                                                              |                                                             |         |

|                                             |              |              |         |
|---------------------------------------------|--------------|--------------|---------|
| Married                                     | 149 (65.6)   | 78 (34.4)    | 0.830   |
| Divorced/Widowed/Separated                  | 25 (65.8)    | 13 (34.2)    |         |
| Single                                      | 7 (70.0)     | 3 (30.0)     |         |
| Alcohol consumption                         |              |              |         |
| No                                          | 74 (67.3)    | 36 (32.7)    | 0.796   |
| Yes                                         | 111 (65.3)   | 59 (34.7)    |         |
| Smoking status                              |              |              |         |
| No                                          | 168 (66.4)   | 85 (33.6)    | 0.835   |
| Yes                                         | 18 (64.3)    | 10 (35.7)    |         |
| Physical activity                           |              |              |         |
| Low                                         | 72 (66.1)    | 37 (33.9)    | 0.974   |
| Middle                                      | 67 (64.4)    | 37 (35.6)    |         |
| High                                        | 44 (66.7)    | 22 (33.3)    |         |
| BMI (kg/m <sup>2</sup> )                    |              |              |         |
| < 23                                        | 54 (69.2)    | 24 (30.8)    | 0.860   |
| 23–24.9                                     | 52 (61.9)    | 32 (38.1)    |         |
| ≥ 25                                        | 78 (67.2)    | 38 (32.8)    |         |
| Hypertension                                |              |              |         |
| No                                          | 91 (59.5)    | 62 (40.5)    | 0.024   |
| Yes                                         | 95 (72.5)    | 36 (27.5)    |         |
| Diabetes                                    |              |              |         |
| No                                          | 142 (62.6)   | 85 (37.4)    | 0.059   |
| Yes                                         | 43 (76.8)    | 13 (23.2)    |         |
| Compliance in taking the statin at 6 months |              |              |         |
| < 80%                                       | 0 (0.0)      | 11 (100.0)   | < 0.001 |
| ≥ 80%                                       | 171 (69.2)   | 76 (30.8)    |         |
| SBP (mmHg)                                  | 127.4 (13.3) | 128.2 (11.6) | 0.627   |
| DBP (mmHg)                                  | 76.3 (9.6)   | 77.3 (8.3)   | 0.354   |
| Fasting glucose (mg/dL)                     | 111.9 (21.1) | 107.2 (27.3) | 0.137   |
| HbA1c (%)                                   | 6.3 (1.0)    | 10.8 (3.3)   | 0.173   |
| TC (mg/dL)                                  | 224.3 (30.1) | 245.8 (31.3) | < 0.001 |
| TG (mg/dL)                                  | 146.5 (79.9) | 146.6 (63.5) | 0.992   |
| HDL-C (mg/dL)                               | 55.2 (16.4)  | 60.8 (17.5)  | 0.008   |
| LDL-C (mg/dL)                               | 146.3 (28.1) | 160.7 (24.3) | < 0.001 |

TG: triglyceride, SD: standard deviation, KRW: Korean Won, BMI: body mass index, SBP: systolic blood pressure, DBP: diastolic blood pressure, HbA1c: hemoglobin A1c, TC: total cholesterol, HDL-C: high-density lipoprotein cholesterol, LDL-C: low-density lipoprotein cholesterol, P for trend is presented for (2 x n) variables.
